# Supplementary material for: Examining the Associations between Indigenous Rangers, Culture and Wellbeing in Australia, 2018–2020
Source: MDPI journal article supplement (doi:10.3390/ijerph18063053), 2021-03-16
Supplement: s1 [file s1]

## Supplementary Materials:

**Table S1.** Changes in Mayi Kuwayu survey questions from proof-of-concept study to baseline survey.

| Question area     | Question in the proof-of-concept study                                                                                                                                                                                                                                                                                                                                        | Question in the Mayi Kuwayu baseline survey                                                                                                                                                                                                                                                                                                                                                                                                                                                                                                                                                                                                                                              |
|-------------------|-------------------------------------------------------------------------------------------------------------------------------------------------------------------------------------------------------------------------------------------------------------------------------------------------------------------------------------------------------------------------------|------------------------------------------------------------------------------------------------------------------------------------------------------------------------------------------------------------------------------------------------------------------------------------------------------------------------------------------------------------------------------------------------------------------------------------------------------------------------------------------------------------------------------------------------------------------------------------------------------------------------------------------------------------------------------------------|
| Financial status  | Q: Given your current needs and financial responsibilities, indicate if you are: very poor, poor, just getting along, reasonably comfortable, very comfortable or prosperous'.<br><br>Recoding: Responses were categorized as low financial status (very poor, poor or just getting along) or high financial status (reasonably comfortable, very comfortable or prosperous). | Q: "Which words best describe your family's money situation"? Responses included: "we have a lot of savings", "we have some savings", "we have just enough to get us to the next payday", "we run out of money before payday" or "we are spending more than we get".<br><br>Recoding: Responses were recoded to: high (included participants who selected "we have a lot of savings"), medium (included participants who selected "we have some savings" "we have just enough to get us to the next payday"), low (included participants who selected "we run out of money before payday" or "we are spending more than we get"), and missing (included responses of unsure or missing). |
| Family wellbeing  | Q: A modified Western Australian Aboriginal Child Health Survey family functioning scale<br><br>Answer: Response options of 'not at all' (1) to 'very much' (5).<br><br>Recoding: Responses were summed (range: 9–45), and participants were categorized as having low/moderate (score 9–36) or high family wellbeing (score 37–45).                                          | Q: A modified Western Australian Aboriginal Child Health Survey family functioning scale.<br><br>Answer: Response options included not at all, a little bit, a fair bit, a lot, unsure<br><br>Recoding: Responses were summed (range: 0–36), and participants were categorised as having low/moderate (score 0–29) or high family wellbeing (score 30–36).                                                                                                                                                                                                                                                                                                                               |
| Life Satisfaction | Q: How satisfied are you with your life as a whole?<br>A: A scale from 0 (completely dissatisfied) to 10 (completely satisfied).<br><br>Recoding: Scores were categorized as low to high life satisfaction (score 0–8) or very high life satisfaction (score 9–10).                                                                                                           | Q: How satisfied are you with your life? A: A lot, A fair bit, a little bit, Not at all.<br><br>Recoding: Categorised as low to high life satisfaction (a little bit, not at all, a fair bit) or very high life satisfaction (a lot).                                                                                                                                                                                                                                                                                                                                                                                                                                                    |

**Table S2.** Postcodes used to determine geographic locations: Central Australia and non-Central Australia.

| Geographic location   | Postcodes                                                                          |
|-----------------------|------------------------------------------------------------------------------------|
| Central Australia     | 0870, 0871, 0872, 0861, 0862, 0852, 4825, 5723, 6765, 6770, 6753, 6430, 6433, 6431 |
| non-Central Australia | All remaining participants, including those with missing postcode.                 |

\*Central Australia is often colloquially termed as the southern part of the Northern Territory. In our paper, Central Australia includes not only the southern part of the NT, but is a larger geographic zone that overlaps state and territory boundary of South Australia, Western Australian and Northern Territory. It also extends to the Barkly region, and includes Lajamanu and Dagaragu communities, encompassing the service area of the Central Land Council. This wider region of Central Australia ensures that related and closely associated (through for example, kinship and language groups) Aboriginal and Torres Strait Islander groups are included in our analysis.

**Table S3.** Health conditions and health risk factors of Rangers and non-Rangers by geographic location.

| % (n)         | Geographic location |            |                       |             | TOTAL       |            |             |
|---------------|---------------------|------------|-----------------------|-------------|-------------|------------|-------------|
|               | Central Australia   |            | non-Central Australia |             |             |            |             |
|               | non-Ranger          | Ranger*    | non-Ranger            | Ranger*     | non-Ranger  | Ranger*    | Total       |
|               | N=494               | N=102      | N=8931                | N=164       | N=9425      | N=266      | N=9691      |
| Heart disease |                     |            |                       |             |             |            |             |
| no            | 91.3% (451)         | 91.2% (93) | 88.8% (7933)          | 86.6% (142) | 89.0%(8384) | 88.3%(235) | 88.9%(8619) |
| yes           | 8.7% (43)           | 8.8% (9)   | 11.2% (998)           | 13.4% (22)  | 11.0%(1041) | 11.7%(31)  | 11.1%(1072) |
| Stroke        |                     |            |                       |             |             |            |             |
| no            | **                  | **         | 97.3% (8687)          | 95.1% (156) | 97.4%(9180) | 97.0%(258) | 97.4%(9438) |

|                        |             |            |              |             |             |            |             |
|------------------------|-------------|------------|--------------|-------------|-------------|------------|-------------|
| yes                    | **          | **         | 2.7% (244)   | 4.9% (8)    | 2.6%(245)   | 3.0%(8)    | 2.6%(253)   |
| Diabetes               |             |            |              |             |             |            |             |
| no                     | 80.4% (397) | 76.5% (78) | 83.0% (7409) | 79.9% (131) | 95.8%(9027) | 97.4%(259) | 95.8%(9286) |
| yes                    | 19.6% (97)  | 23.5% (24) | 17.0% (1522) | 20.1% (33)  | 4.2%(398)   | 2.6%(7)    | 4.2%(405)   |
| Health Condition score |             |            |              |             |             |            |             |
| No conditions          | 75.7% (374) | 72.5% (74) | 75.1% (6704) | 72.6% (119) | 75.1%(7078) | 72.6%(193) | 75.0%(7271) |
| 1 or more              | 24.3% (120) | 27.5% (28) | 24.9% (2227) | 27.4% (45)  | 15.1%(1419) | 27.4%(73)  | 25.0%(2420) |
| High blood pressure    |             |            |              |             |             |            |             |
| no                     | 82.2% (406) | 77.5% (79) | 67.2% (6006) | 64.6% (106) | 68.0%(6412) | 69.5%(185) | 68.1%(6597) |
| yes                    | 17.8% (88)  | 22.5% (23) | 32.8% (2925) | 35.4% (58)  | 32.0%(3013) | 30.5%(81)  | 31.9%(3094) |
| High cholesterol       |             |            |              |             |             |            |             |
| no                     | 89.5% (442) | 93.1% (95) | 72.0% (6426) | 73.2% (120) | 72.9%(6868) | 80.8%(215) | 73.1%(7083) |
| yes                    | 10.5% (52)  | 6.9% (7)   | 28.0% (2505) | 26.8% (44)  | 27.1%(2557) | 19.2%(51)  | 26.9%(2608) |
| Smoking                |             |            |              |             |             |            |             |
| Current smoker         | 44.3% (219) | 47.1% (48) | 24.4% (2176) | 35.4% (58)  | 25.4%(2395) | 39.8%(106) | 25.8%(2501) |
| Never smoker           | 8.7% (43)   | 15.7% (16) | 33.7% (3008) | 29.3% (48)  | 32.4%(3051) | 24.1%(64)  | 32.1%(3115) |
| Past smoker            | 41.9% (207) | 31.4% (32) | 39.4% (3522) | 33.5% (55)  | 39.6%(3729) | 32.7%(87)  | 39.4%(3816) |
| Missing                | 5.1% (25)   | 5.9% (6)   | 2.5% (225)   | 1.8% (3)    | 2.7%(250)   | 3.4%(9)    | 2.7%(259)   |
| Risk factor score      |             |            |              |             |             |            |             |
| No risk factors        | 37.2% (184) | 29.4% (30) | 40.3% (3597) | 31.1% (51)  | 40.1%(3781) | 30.5%(81)  | 39.9%(3862) |
| 1 or more              | 57.7% (285) | 64.7% (66) | 57.2% (5109) | 67.1% (110) | 57.2%(5394) | 66.2%(176) | 57.5%(5570) |
| Missing                | 5.1% (25)   | 5.9% (6)   | 2.5% (225)   | 1.8% (3)    | 2.7%(250)   | 3.4%(9)    | 2.7%(259)   |

\*\*Not reported due to small cell count <5. \*Ranger included anyone who was formerly or is currently a Ranger.

**Table S4:** Univariate analysis (prevalence rate ratio) of the relationship between cultural factors and wellbeing outcome.

| univariate analysis                                     |                                        | Very high life satisfaction | High family wellbeing   | Good general health     | High psychological wellbeing |
|---------------------------------------------------------|----------------------------------------|-----------------------------|-------------------------|-------------------------|------------------------------|
| First language                                          | English/Other                          | 1.0 (base)                  | 1.0 (base)              | 1.0 (base)              | 1.0 (base)                   |
|                                                         | Aboriginal or Torres Strait Islander   | <b>1.54 (1.40,1.69)</b>     | <b>1.68(1.57,1.80)</b>  | <b>1.20(1.15,1.25)</b>  | 1.05 (0.96,1.15)             |
|                                                         | Missing                                | 1.09 (0.94,1.28)            | <b>1.15 (1.01,1.31)</b> | 0.94 (0.87,1.02)        | 0.85 (0.74,0.98)             |
|                                                         | Not at all                             | 1.0 (base)                  | 1.0 (base)              | 1.0 (base)              | 1.0 (base)                   |
| Confident to speak                                      | A little bit                           | 0.85 (0.77, 0.94)           | <b>1.27 (1.17,1.37)</b> | 1.01 (0.97,1.05)        | 1.06 (0.99,1.13)             |
|                                                         | A fair bit                             | 1.08 (0.95,1.24)            | <b>1.47(1.32,1.62)</b>  | <b>1.13 (1.06,1.20)</b> | <b>1.11 (1.00,1.23)</b>      |
|                                                         | A lot                                  | <b>1.52 (1.39,1.67)</b>     | <b>1.86 (1.72,2.00)</b> | <b>1.19 (1.14,1.25)</b> | 1.05 (0.96,1.15)             |
|                                                         | Want to but can't                      | 0.77 (0.70,0.84)            | 0.92 (0.85,0.99)        | 1.00(0.97,1.04)         | 1.03 (0.97,1.10)             |
|                                                         | Unsure                                 | 0.88 (0.77,1.0)             | 0.92(0.82,1.03)         | (0.87,0.98)             | 1.00 (0.92,1.10)             |
|                                                         | Missing                                | 1.01 (0.92, 1.12)           | <b>1.17 (1.06,1.28)</b> | 0.93 (0.89,0.98)        | 0.95 (0.87,1.03)             |
| Speaks an Aboriginal or Torres Strait Islander language | No                                     | 1.0 (base)                  | 1.0 (base)              | 1.0 (base)              | 1.0 (base)                   |
|                                                         | yes, a little bit                      | 0.91 (0.85,0.98)            | <b>1.30 (1.23,1.37)</b> | 1.02 (0.99,1.05)        | 0.91 (.85,0.98)              |
|                                                         | Yes, a fair bit                        | 1.04 (0.88, 1.23)           | <b>1.67 (1.51,1.85)</b> | <b>1.11 (1.04,1.18)</b> | <b>1.04 (0.89,1.23)</b>      |
|                                                         | Yes, a lot                             | <b>1.75 (1.58, 1.93)</b>    | <b>2.01 (1.85,2.17)</b> | <b>1.26 (1.20,1.32)</b> | <b>1.75 (1.58,1.93)</b>      |
|                                                         | Missing                                | 0.96 (0.81,1.13)            | <b>1.33 (1.17,1.51)</b> | 0.96 (0.89,1.04)        | 0.96(0.80,1.13)              |
| Lives on country                                        | No                                     | 1.0 (base)                  | 1.0 (base)              | 1.0 (base)              | 1.0 (base)                   |
|                                                         | Yes                                    | <b>1.05 (1.0,1.13)</b>      | <b>1.12 (1.06,1.18)</b> | 0.95 (0.90,1.00)        | 1.0 (0.97,1.03)              |
|                                                         | Unsure                                 | 0.83 (0.72,0.94)            | 0.73 (0.64,0.83)        | 0.95 (0.87,1.04)        | 0.93 (0.87,0.99)             |
|                                                         | Missing                                | 1.06 (0.90,1.25)            | 1.00 (0.86,1.17)        | 0.91 (0.79,1.05)        | 0.90 (0.82,0.98)             |
| Cultural responsibilities for country                   | No                                     | 1.0 (base)                  | 1.0 (base)              | 1.0 (base)              | 1.0 (base)                   |
|                                                         | Yes (includes mothers, fathers, other) | <b>1.08 (1.01,1.16)</b>     | <b>1.32(1.24,1.39)</b>  | 0.96 (0.93,0.99)        | 0.98(0.92,1.02)              |
|                                                         | Unsure                                 | 0.79 (0.72,0.86)            | 0.80 (0.73,0.86)        | 0.88 (0.84,0.91)        | 1.0(0.94,1.06)               |
|                                                         | Missing (unselected and missing)       | 0.94 (0.81,1.09)            | <b>1.22 (1.08,1.37)</b> | 0.94(0.87,1.00)         | 0.96(0.85,1.08)              |
| Spends time on country                                  | Not at all                             | 1.0 (base)                  | 1.0 (base)              | 1.0 (base)              | 1.0 (base)                   |
|                                                         | A little bit                           | 0.84 (0.78,0.92)            | <b>1.18 (1.09,1.27)</b> | 1.02 (0.99,1.06)        | <b>1.09 (1.03,1.16)</b>      |
|                                                         | A fair bit                             | 0.91 (0.82, 1.00)           | <b>1.51 (1.39,1.63)</b> | 1.03 (0.98,1.08)        | 1.05 (0.97,1.31)             |
|                                                         | A lot                                  | <b>1.30 (1.19, 1.42)</b>    | <b>1.74 (1.61,1.88)</b> | <b>1.07 (1.02,1.12)</b> | 1.03 (0.95,1.11)             |
|                                                         | Want to but can't                      | 0.70 (0.64,0.79)            | 0.89 (0.81,0.98)        | 0.92 (0.88,0.96)        | 0.99 (0.93,1.07)             |
|                                                         | Missing                                | 0.94 (0.83,1.06)            | <b>1.16 (1.04,1.31)</b> | 0.88 (0.82,0.93)        | 0.97 (0.88,1.07)             |
